# Supplementary material for: The Separation of Chlorobenzene Compounds from Environmental Water Using a Magnetic Molecularly Imprinted Chitosan Membrane
Source: MDPI journal article supplement (doi:10.3390/polym14153221), 2022-08-08
Supplement: s1 [file s1]

# Separation of Chlorobenzene Compounds from Environmental Water Using Magnetic Molecularly Imprinted Chitosan Membrane

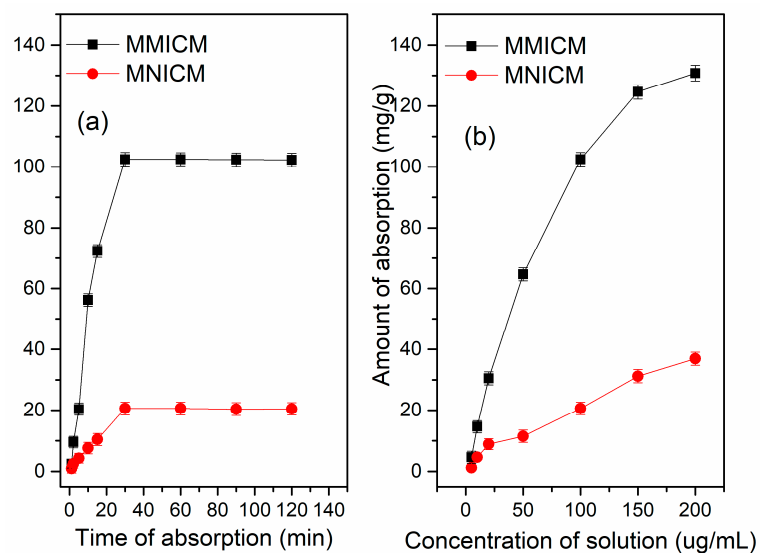

**Figure S1.** Dynamic adsorption (a) and static adsorption (b) of MMICM and MNICM for chlorobenzene.

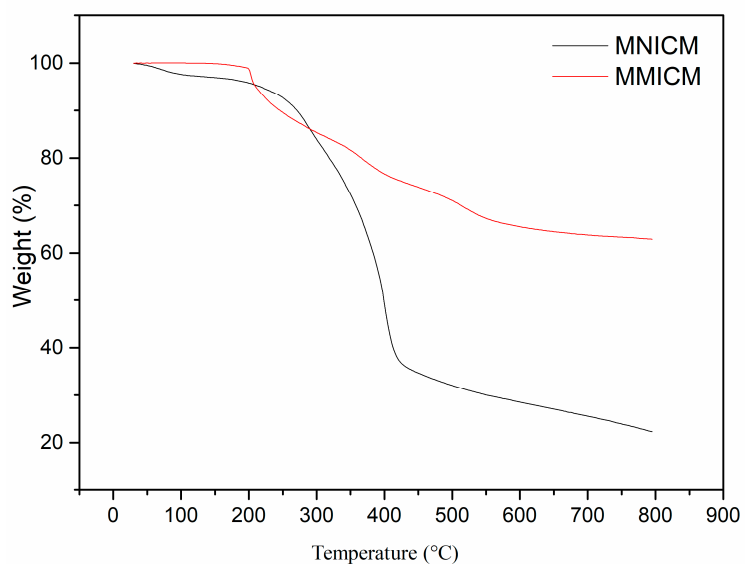

**Figure S2.** TGA curves of MNICM and MMICM.

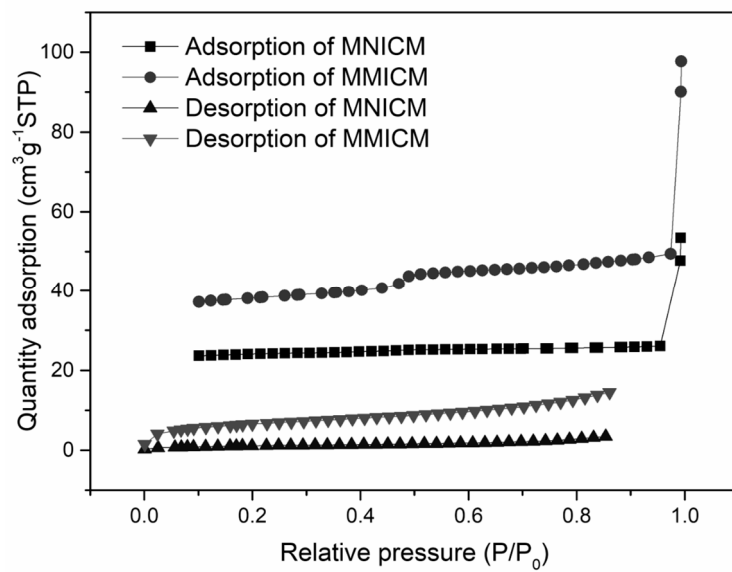

**Figure S3.** BET analysis of the MMICM and MNICM.

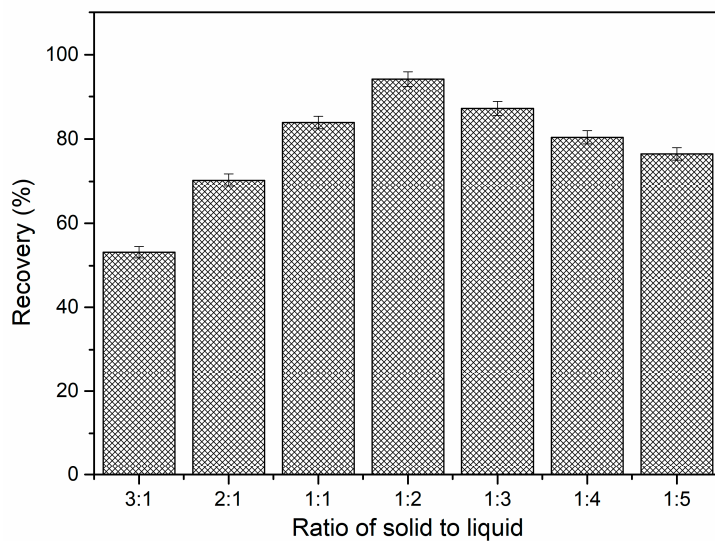

**Figure S4.** Effect of adsorbent and sample volume on the MMS procedure.

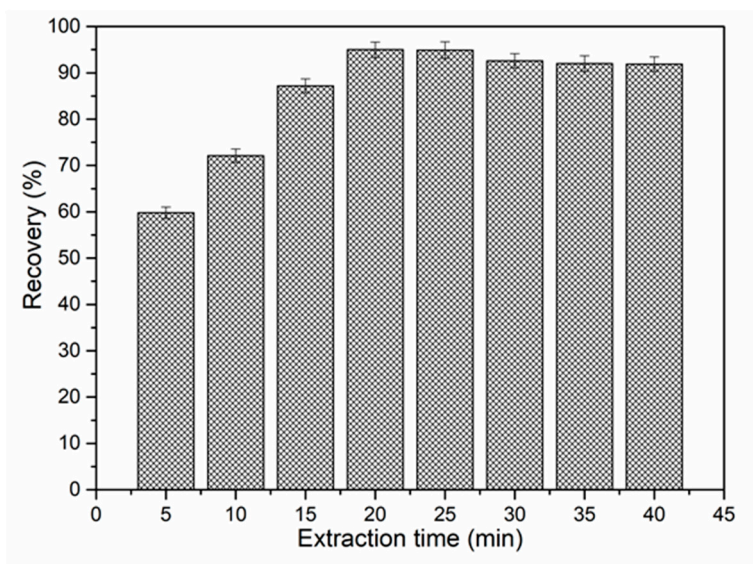

**Figure S5.** Effect of extraction time on the MMS procedure.

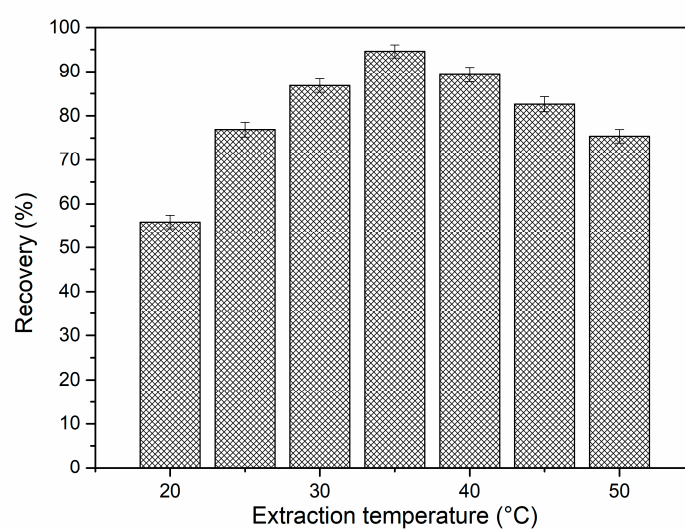

**Figure S6.** Effect of extraction temperature on the MMS procedure.

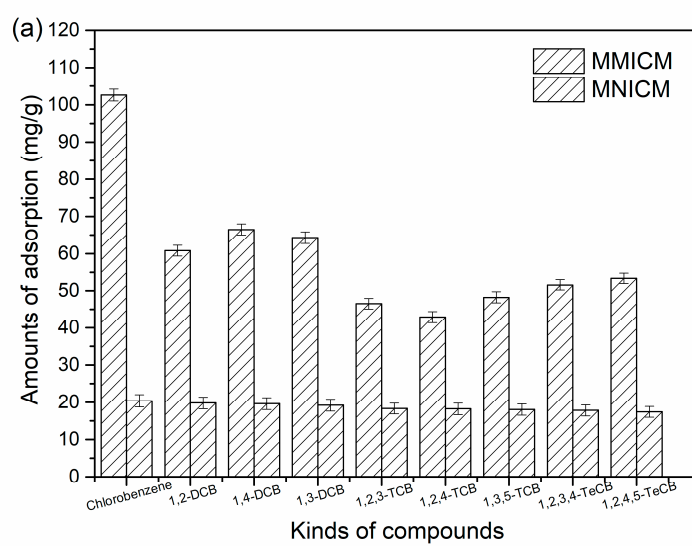

**Figure S7.** Adsorption amounts of different kinds of chlorobenzene compounds by MNICM and MMICM.

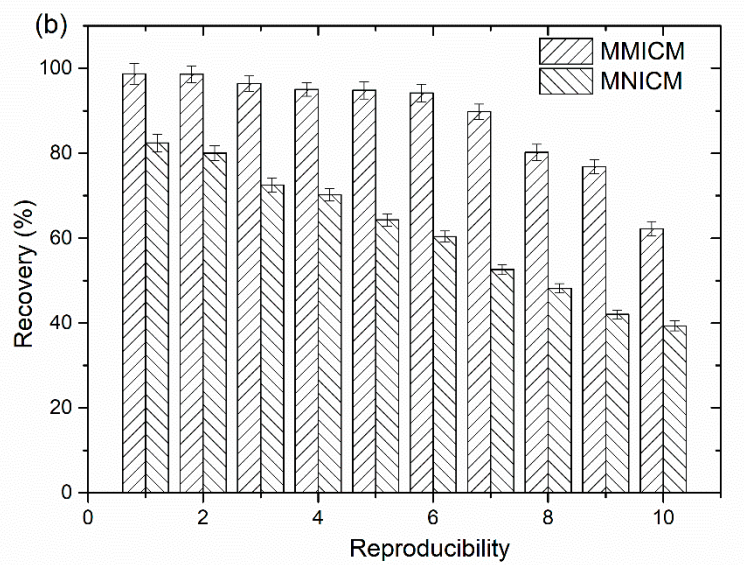

**Figure S8.** Reproducibility and stability of MNICM and MMICM.

**Table S1** Intra-day and Inter-day precisions and accuracies of chlorobenzene compounds.

| Targets              | Concentration<br>( $\mu\text{g}\cdot\text{mL}^{-1}$ ) | Intra-day                                   |                                             |              |                 | Inter-day       |                 |
|----------------------|-------------------------------------------------------|---------------------------------------------|---------------------------------------------|--------------|-----------------|-----------------|-----------------|
|                      |                                                       | LOD<br>( $\mu\text{g}\cdot\text{mL}^{-1}$ ) | LOQ<br>( $\mu\text{g}\cdot\text{mL}^{-1}$ ) | Recovery (%) | RSD<br>(%, n=4) | Recovery<br>(%) | RSD<br>(%, n=4) |
| <b>Chlorobenzene</b> | 100                                                   | 0.27                                        | 0.32                                        | 97.08        | 4.72            | 96.43           | 5.15            |
|                      | 200                                                   | 0.16                                        | 0.26                                        | 101.06       | 3.83            | 99.51           | 3.12            |
| 1,2-DCB              | 100                                                   | 0.31                                        | 0.46                                        | 96.89        | 5.12            | 97.13           | 6.02            |
|                      | 200                                                   | 0.20                                        | 0.35                                        | 101.13       | 4.06            | 96.98           | 4.16            |
| 1,4-DCB              | 100                                                   | 0.33                                        | 0.56                                        | 98.17        | 4.29            | 97.01           | 5.91            |
|                      | 200                                                   | 0.29                                        | 0.35                                        | 99.87        | 3.87            | 98.16           | 3.28            |
| 1,3-DCB              | 100                                                   | 0.45                                        | 0.79                                        | 106.97       | 5.03            | 96.00           | 4.69            |
|                      | 200                                                   | 0.39                                        | 0.68                                        | 102.52       | 4.01            | 97.13           | 3.12            |
| 1,2,3-TCB            | 100                                                   | 0.42                                        | 0.86                                        | 95.21        | 4.15            | 92.98           | 5.12            |
|                      | 200                                                   | 0.36                                        | 0.57                                        | 97.00        | 3.21            | 95.07           | 4.65            |
| 1,2,4-TCB            | 100                                                   | 0.35                                        | 0.68                                        | 95.15        | 4.31            | 92.78           | 5.42            |
|                      | 200                                                   | 0.27                                        | 0.45                                        | 103.54       | 3.01            | 99.12           | 3.75            |
| 1,3,5-TCB            | 100                                                   | 0.56                                        | 0.98                                        | 93.18        | 4.31            | 92.03           | 5.12            |
|                      | 200                                                   | 0.48                                        | 0.67                                        | 95.02        | 3.08            | 94.13           | 3.46            |
| 1,2,3,4-TeCB         | 100                                                   | 0.57                                        | 0.96                                        | 90.96        | 4.53            | 89.02           | 4.18            |
|                      | 200                                                   | 0.45                                        | 0.82                                        | 102.17       | 3.96            | 90.13           | 3.24            |
| 1,2,4,5-TeCB         | 100                                                   | 0.50                                        | 0.87                                        | 95.89        | 4.34            | 91.24           | 4.79            |
|                      | 200                                                   | 0.39                                        | 0.65                                        | 99.12        | 3.03            | 93.42           | 3.83            |

1,2-dichlorobenzene (1,2-DCB), 1,4-dichlorobenzene (1,4-DCB), 1,3-dichlorobenzene (1,3-DCB), 1,2,3-trichlorobenzene (1,2,3-TCB), 1,2,4-trichlorobenzene (1,2,4-TCB), 1,3,5-trichlorobenzene (1,3,5-TCB), 1,2,3,4-tetrachlorobenzene (1,2,3,4-TeCB) and 1,2,4,5-tetrachlorobenzene (1,2,4,5-TeCB)
